# Supplementary material for: Therapeutic Potential of a New Jumbo Phage That Infects Vibrio coralliilyticus, a Widespread Coral Pathogen
Source: Front Microbiol. 2018 Oct 24;9:2501. doi: 10.3389/fmicb.2018.02501 (PMC6207643; doi:10.3389/fmicb.2018.02501)
Supplement: Supplementary file 2 [file Data_Sheet_2.docx]

Table S1: List of bacteria tested for the determination of the host range of *Vibrio phage* BONAISHI. For the pairwise infections, a 5 µL aliquot of freshly produced BONAISHI lysate was spotted on a lawn of exponentially growing bacteria. The formation of plaques was recorded after 24 and 48h. ⦁ indicates lysis.

|  | ***V. corallilyticus* phage BONAISHI** |
| --- | --- |
| *Photobacterium rosenbergii* LMG22226 a |  |
| *Vibrio shiloni* LMG19703 a |  |
| *Enterovibrio coralli* LMG22228 a |  |
| *Vibrio coralliilyticus* LMG21348 a | • |
| *Vibrio coralliilyticus* LMG20984 a | • |
| *Vibrio coralliilyticus* LMG23696 a | • |
| *Vibrio sp. cf coralliilyticus* 1H13 b | • |
| *Vibrio sp. cf coralliilyticus* WH2 b |  |
| *Vibrio tubiashi* LMG10936T a |  |
| *Vibrio alginolyticus* 9H16 b |  |
| *Vibrio alginolyticus* 8B b |  |
| *Vibrio alginolyticus* 44097 c |  |
| *Vibrio sp. cf alginolyticus* 9H3 b |  |
| *Vibrio sp. cf alginolyticus* 3B32 b |  |
| *Vibrio sp. cf alginolyticus* 1H9 b |  |
| *Vibrio sp. cf alginolyticus* 3B21 b |  |
| *Vibrio sp. cf alginolyticus* 8B9 b |  |
| *Vibrio parahaemolyticus* LMG2850 a |  |
| *Vibrio parahaemolyticus* LMG4423 a |  |
| *Vibrio sp. cf parahaemolyticus* 4B25 b |  |
| *Vibrio harveyi* LMG19714 a |  |
| *Vibrio harveyi* ORM4 c |  |
| *Vibrio harveyi* LMG4044 a |  |
| *Vibrio harveyi* 7B6 b |  |
| *Vibrio harveyi* 8B6 b |  |
| *Vibrio sp. cf harveyi* 5B8 b |  |
| *Vibrio sp cf. harveyi* SWAT3 d |  |
| *Vibrio sp. communis* WB3 b |  |
| *Vibrio nigripulchritudo* 5065 c |  |
| *Vibrio nigripulchritudo* SFn1 c |  |
| *Vibrio campbelli* LMG11216 a |  |
| *Vibrio aesturianus* 02/041 c |  |
| *Vibrio vulnificus* CIP 755AT c |  |
| *Vibrio tapetis* LP2 c |  |
| *Vibrio tapetis* CECT4600 c |  |
| *Vibrio splendidus* MEL32 c |  |
| *Vibrio splendidus* ATCC25914 e |  |
| *Vibrio sp.*1H11 b |  |
| *Vibrio sp.* 8B12 b |  |
| *Vibrio sp.* 9H4 b |  |
| *Vibrio sp.* 8B23 b |  |
| *Vibrio sp.* cf gallicus 4B2 b |  |
| *Vibrio sp.* cf gallicus/ xuii 4B3 b |  |
| *Listonella anguillarum* 4B1 b |  |

a BCCM/ LMG Bacteria Collection, b Baudoux private bacteria collection (Station Biologique de Roscoff), c Paillard private bacteria collection (Institut Universitaire Européen de la Mer), d Azam private bacteria collection (Scripps Institute of Oceanography), e ATCC Bacteriology Collection
